# Supplementary material
Source: publisher figshare collection journal article supplement (https://asha.figshare.com/articles/dataset/_/16435365)
Supplement: Supplementary file 2 [file 1]

**Supplemental Material S3.** Integrated overview of themes, categories, and sample responses.

| Theme                        | Description/Categories                                                               | Sample Responses                                                                                                                           |
|------------------------------|--------------------------------------------------------------------------------------|--------------------------------------------------------------------------------------------------------------------------------------------|
| Affirmation of Contributions | <b>Categories related to receiving professional validation.</b>                      |                                                                                                                                            |
|                              | RES:RESPECT                                                                          | Getting the respect I deserve from colleagues/administrators.                                                                              |
|                              | REC:RECOGNITION                                                                      | Being recognized by my institution and community for the work that I am doing.                                                             |
| Equity/Diversity             | <b>Categories that related to equity, cultural, and linguistic diversity.</b>        |                                                                                                                                            |
|                              | CLC:CULTCOMP                                                                         | This means training on cultural competency for, at minimum, administrators.                                                                |
|                              | ED:EQUITYDIVER                                                                       | Add color to the leadership-- in ASHA, CAA, CFCC, etc.                                                                                     |
|                              | LAD:LANGDIFF                                                                         | Speaking English as a second language.                                                                                                     |
|                              | POC:PERSONOFCOLOR                                                                    | Knowing that I am a first generation Latina in academia I feel like I bring in a completely different and unique perspective to the table. |
| Faculty Resource Issues      | <b>Categories related to recruitment, retention, &amp; professional development.</b> |                                                                                                                                            |
|                              | GEO:Geography                                                                        | Re-establishing a research and teaching agenda in new regions.                                                                             |
|                              | SAL:Salary                                                                           | Adequate salary. Increase pay.                                                                                                             |
|                              | TRDEV:Traindev                                                                       | Prioritize leadership development among minority faculty                                                                                   |
|                              | RER:RECRRETEN                                                                        | It is important to recognize the immense need for                                                                                          |

|                             |                                                                                                                                |                                                                                                                                                  |
|-----------------------------|--------------------------------------------------------------------------------------------------------------------------------|--------------------------------------------------------------------------------------------------------------------------------------------------|
|                             |                                                                                                                                | recruiting faculty of color into our professional fields and into academia.                                                                      |
| <b>Institutional Issues</b> | <b>Categories that relate to faculty issues, however, these issues and/or decisions are above the level of the individual.</b> |                                                                                                                                                  |
|                             | CLM:CLIMATE                                                                                                                    | Evaluate your department culture and composition.                                                                                                |
|                             | FUN:FUNDINGBUDGET                                                                                                              | Lack of funding for research related activities                                                                                                  |
|                             | POP:POLPROC                                                                                                                    | Many programs/institutions have an implicit bias against diversity - even in policies and procedures                                             |
|                             | PRISS:Profiss                                                                                                                  | The reinvention of the profession with more areas of specialization.                                                                             |
| Social connections          | <b>Categories related to relationships necessary for personal and emotional support</b>                                        |                                                                                                                                                  |
|                             | CFAM:Commfam                                                                                                                   | Creating literacy programs that are meaningful to me and beneficial to the community.                                                            |
|                             | COR:RELACOLLEA                                                                                                                 | Compassionate colleagues who value and step in for each other.                                                                                   |
|                             | ISO:ISOLATION                                                                                                                  | One is a lonely number.                                                                                                                          |
| Professional Relationships  | <b>Categories that are related to all levels of professional relationships (peer, students, colleagues and collaborators).</b> |                                                                                                                                                  |
|                             | COLL: COLLABORATION                                                                                                            | Collaborating with other professionals I have the opportunity to collaborate with so many professionals particularly educators in this position. |
|                             | COMM:Communication                                                                                                             | Be honest and up front.                                                                                                                          |

|                                        |                                                                                                                                               |                                                                                                                                                                                                                                                                                                                                                             |
|----------------------------------------|-----------------------------------------------------------------------------------------------------------------------------------------------|-------------------------------------------------------------------------------------------------------------------------------------------------------------------------------------------------------------------------------------------------------------------------------------------------------------------------------------------------------------|
|                                        | MEN:MENTORING                                                                                                                                 | Mentoring program for new faculty of color.                                                                                                                                                                                                                                                                                                                 |
|                                        | NET:NETWORKING                                                                                                                                | Establish a network outside of your institution. A network that includes other people they can speak to, encourage, get encouragement from, collaborate with and who will understand what it means to be an under-represented female in a field dominated by white women working in institutions where many times administration is dominated by white men. |
|                                        | SUP:SUPPORT                                                                                                                                   | Support from my chair.                                                                                                                                                                                                                                                                                                                                      |
| Wholistic Perspective of Academic Life | <b>Categories that describe affective strategies and consideration of issues that allow for integration of the personal and professional.</b> |                                                                                                                                                                                                                                                                                                                                                             |
|                                        | SLD:SELFDETERMINATION                                                                                                                         | Work hard and pray a lot. Write your own narrative don't let others write it for you.                                                                                                                                                                                                                                                                       |
|                                        | WLB:WORKLIFE                                                                                                                                  | Balancing family and work expectations.                                                                                                                                                                                                                                                                                                                     |
| Work Specific Demands                  | <b>Categories that specifically relate to faculty (academic and clinical) position responsibilities.</b>                                      |                                                                                                                                                                                                                                                                                                                                                             |
|                                        | ADM:ADMINDUT                                                                                                                                  | Administrative responsibilities.                                                                                                                                                                                                                                                                                                                            |
|                                        | CLN:CLINIC                                                                                                                                    | Working with clients and seeing good outcomes as a result of what we've taught our students.                                                                                                                                                                                                                                                                |
|                                        | PT:PROMTENU                                                                                                                                   | They evaluate junior faculty without consideration of their other responsibilities.                                                                                                                                                                                                                                                                         |
|                                        | REW:WORKLOADRESPONSIB                                                                                                                         | Balancing teaching load with administrative duties and scholarship expectations I set for myself.                                                                                                                                                                                                                                                           |

|  |               |                                                                                                                                                                                                                                                            |
|--|---------------|------------------------------------------------------------------------------------------------------------------------------------------------------------------------------------------------------------------------------------------------------------|
|  |               |                                                                                                                                                                                                                                                            |
|  | SRV:SERVICE   | One of the challenging aspects is being constantly called by my leadership (request from my Dean, for instance) to represent the 'minority' perspective on committees across the university, making it seem as I am over-committing to service activities. |
|  | STD:STUDENT   | Seeing students 'get it' and flourish.                                                                                                                                                                                                                     |
|  | RES: RESEARCH | Getting my research done.                                                                                                                                                                                                                                  |
|  | TEA: TEACHING | Teaching.                                                                                                                                                                                                                                                  |
