# Supplementary material
Source: publisher figshare collection journal article supplement (https://asha.figshare.com/articles/dataset/_/16435365)
Supplement: Supplementary file 3 [file 1]

**Supplemental Material S2.** Themes and categories coded for participant responses and themes.

| <b>Theme</b>            | <b>Category</b>   | <b>Definition/Description</b>                                                                                                |
|-------------------------|-------------------|------------------------------------------------------------------------------------------------------------------------------|
| Affirmation             | RES:RESPECT       | Respondent specifically mentions respect or disrespect, courtesy.                                                            |
|                         | REC:RECOGNITION   | Respondent specifically mentions recognition, or discusses tangible demonstration of appreciation or merit, perceived value. |
| Diversity               | CLC:CULTCOMP      | Discusses awareness, sensitivity, and appreciation of differences, around issues of language and diversity.                  |
|                         | ED:EQUITYDIVER    | Discusses addressing or not addressing issues related to inequities, fairness, etc.                                          |
|                         | LAD:LANGDIFF      | Discusses how language differences or being non-native English speaker impacts their role in academia.                       |
|                         | POC:PERSONOFCOLOR | Discusses minoritized status, ethnicity, contrasting POC with White etc.                                                     |
| Faculty Resource Issues | GEO:Geography     | Respondent discusses geographical issues – moving, relocating, going where the jobs are, etc.                                |
|                         | SAL:Salary        | Respondent mentions anything related to wages.                                                                               |
|                         | TRDEV:Traindev    | Respondent mentions or discusses anything related to additional education, professional development, training, etc.          |
|                         | RER:RECRRETEN     | Respondent specifically mentions issues of recruitment or retention.                                                         |

|                            |                     |                                                                                                                                             |
|----------------------------|---------------------|---------------------------------------------------------------------------------------------------------------------------------------------|
| Institutional Issues       | CLM:CLIMATE         | Respondent discusses physical, social, and psychological environment of field, university, college, or department (microaggressions, etc.). |
|                            | FUN:FUNDINGBUDGET   | Respondent discusses how funding or budgetary concerns affects their program or ability to do their job.                                    |
|                            | POP:POLPROC         | Respondent mention rules and regulations put into place, bureaucracy.                                                                       |
|                            | PRISS:Profiss       | Respondent specifically mentions the profession, association, ASHA.                                                                         |
| Social Connections         | CFAM:Commfam        | Respondent mentions serving community/families, making contributions to community/family.                                                   |
|                            | COR:RELACOLLEA      | Respondent discusses social connections and interactions with colleagues.                                                                   |
|                            | ISO:ISOLATION       | Respondent discusses feelings of loneliness, being the only one, not feeling connected.                                                     |
| Professional Relationships | COLL: COLLABORATION | Respondent mentions collaboration - working on a project/class with others.                                                                 |
|                            | COMM:Communication  | Respondent mentions need for dialogue, having open and honest discussions or listening, etc.                                                |
|                            | MEN:MENTORING       | Respondent mentions or discusses mentoring- stated in the context of finding a mentor or being a mentor.                                    |
|                            | NET:NETWORKING      | Respondent specifically mentions networking, or the need to know and connect with other people.                                             |
|                            | SUP:SUPPORT         | Respondent specifically mentions support, can be financial, social, and professional.                                                       |

|                        |                       |                                                                                                                                                                                                               |
|------------------------|-----------------------|---------------------------------------------------------------------------------------------------------------------------------------------------------------------------------------------------------------|
| Wholistic Perspectives | SLD:SELFDETERMINATION | Respondent discusses the importance or ability to design future, create career that works for them, working from onset of personal values and interests; discusses the need for persistence, resilience, etc. |
|                        | WLB:WORKLIFE          | Respondent discusses push and pull of trying to figure out how to take care of personal needs while carrying out work responsibilities.                                                                       |
| Work Specific Demands  | ADM:ADMINDUT          | Respondent specifically mentions administration, can include administrative responsibilities, or dealing with administrators.                                                                                 |
|                        | CLN:CLINIC            | Respondent specifically mentions clinic, supervision, etc.                                                                                                                                                    |
|                        | PT:PROMTENU           | Respondent specifically mentions promotion and tenure, discusses meeting requirements for reviews, etc.                                                                                                       |
|                        | REW:WORKLOADRESPONSIB | Respondent discusses trying to balance one or more aspects of work responsibilities.                                                                                                                          |
|                        | SRV:SERVICE           | Respondent specifically mentions service, work responsibilities that are not tied to teaching, research, or administration.                                                                                   |
|                        | STD:STUDENT           | Respondent mentions students outside the context of teaching, this can include student achievement, student success, issues with students.                                                                    |

---
